# Supplementary material for: Suprachiasmatic VIP neurons are required for normal circadian rhythmicity and comprised of molecularly distinct subpopulations
Source: PubMed Central journal article supplement (PMC7468160; doi:10.1038/s41467-020-17197-2), 2020-09-02
Supplement: 41467_2020_17197_MOESM2_ESM.pdf [file 41467_2020_17197_MOESM2_ESM.pdf]

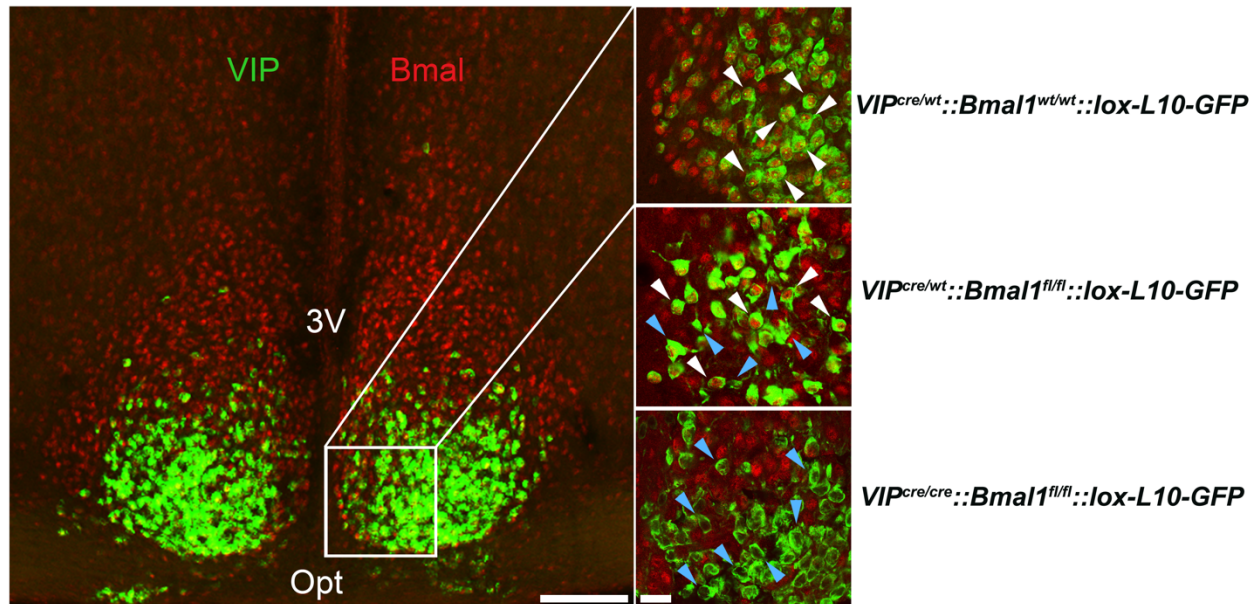

**Figure S1. Deletion of *Bmal1* from SCN<sup>VIP</sup> neurons via genetic cross.**

To quantify the efficiency and specificity of *Bmal1* deletion in *VIP<sup>cre/cre</sup>::Bmal1<sup>fl/fl</sup>* mice we generated triple cross *VIP-ires-Cre::Bmal1<sup>fl/fl</sup>::R26-loxSTOPlox-L10-GFP* mice. Example confocal images of the SCN of *VIP<sup>cre/wt</sup>::Bmal1<sup>wt/wt</sup>::R26-loxSTOPlox-L10-GFP* (L10-GFP) mice showing 100% co-localization between VIP (L10-GFP, green) and *Bmal1* (red; left and top right). In *VIP<sup>cre/wt</sup>::Bmal1<sup>fl/fl</sup>::L10-GFP* mice, ~ 70% of VIP-positive neurons continued to express *Bmal1* (center right). In *VIP<sup>cre/cre</sup>::Bmal1<sup>fl/fl</sup>::L10-GFP* mice, 0% of VIP-positive neuron expresses *Bmal1* (bottom right), although *Bmal1* continued to be abundantly expressed in adjacent non-VIPergic neurons of the ventral SCN. White arrows indicate VIP-*Bmal1* co-localization, while blue arrows show absence of co-localization. Scale bars: left, 100  $\mu$ m and right, 20  $\mu$ m.

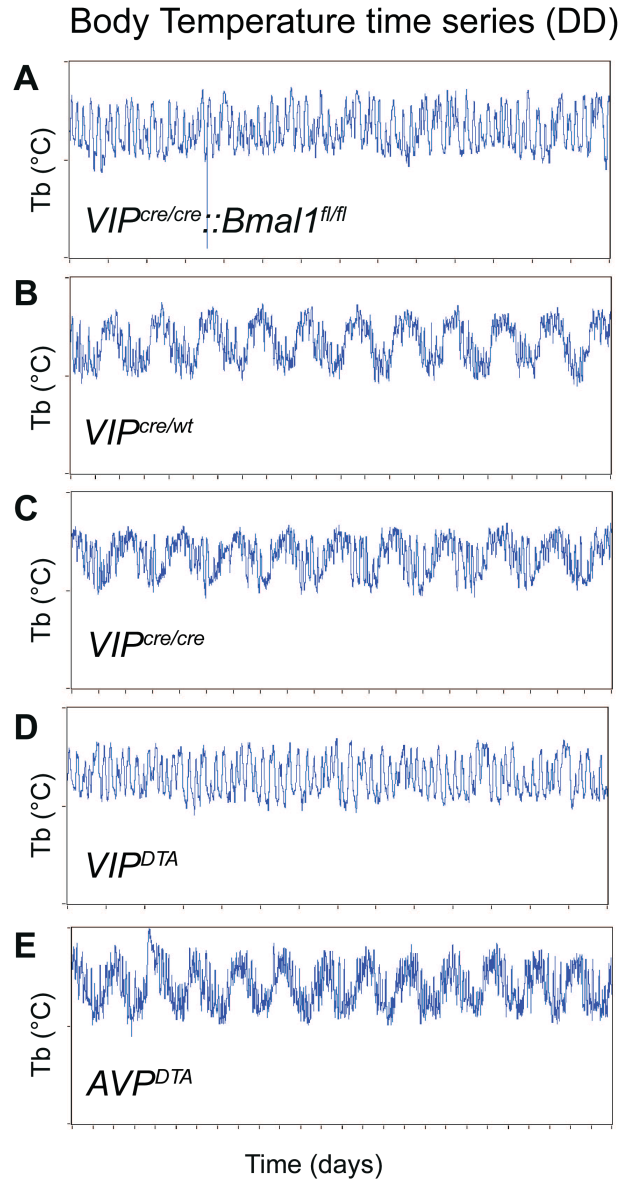

**Figure S2. Tb rhythm waveforms in DD in  $VIP^{cre/wt}$ ,  $VIP^{cre/cre}$ ,  $VIP^{cre/cre}::Bmal1^{fl/fl}$ ,  $VIP^{DTA}$ , and  $AVP^{DTA}$  mice. Related to Figure 1 and 3. Selective deletion of *Bmal1* in  $SCN^{VIP}$  neurons (A) has clear visible disruptive effective on the Tb waveform compared to  $VIP^{cre/wt}$  (B) and  $VIP^{cre/cre}$  (C) mice, yet these rhythms, per periodogram analysis, retain a circadian component in the  $VIP^{cre/cre}::Bmal1^{fl/fl}$  mouse. Selective ablation of  $SCN^{VIP}$  neurons (D), but not  $SCN^{AVP}$  neurons (E), severely disrupts circadian rhythms of Tb.**

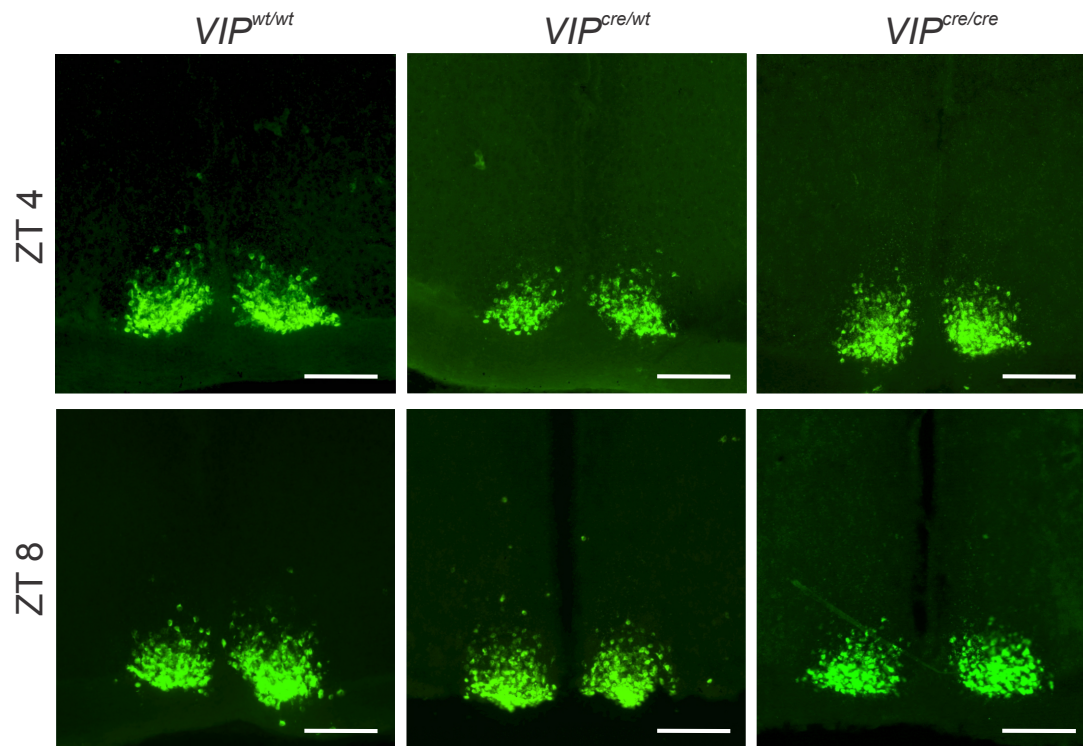

**Figure S3. VIP mRNA expression in  $VIP^{wt/wt}$ ,  $VIP^{cre/wt}$  and  $VIP^{cre/cre}$  conditions.**

**Related to Figure 1.** RNAscope-based *in situ* hybridization for VIP mRNA within the SCN is shown from brains sacrificed at ZT4 (upper panels) and ZT8 (lower panels) for  $VIP^{wt/wt}$ ,  $VIP^{cre/wt}$  and  $VIP^{cre/cre}$ . VIP transcript levels are visually comparable across the wild type, heterozygous and homozygous condition in *VIP-ires-Cre* mice. Scale bars: 100  $\mu\text{m}$ .

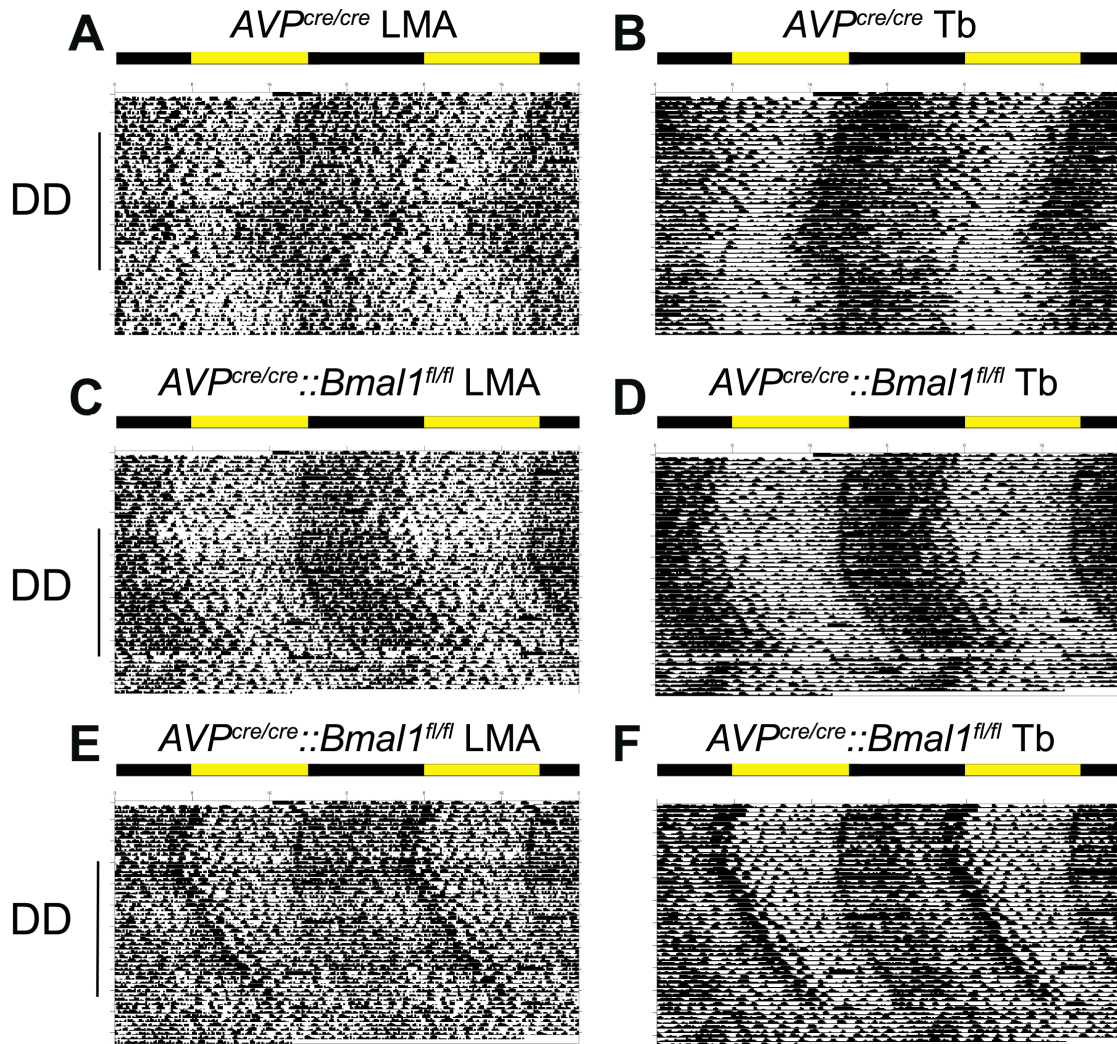

**Figure S4. Loss of the molecular clock in  $SCN^{AVP}$  neurons on LMA and Tb rhythms.**  
**Related to Figure 1.** A-B. Example actogram (LMA; A,C,E) and Tb variation (B,D,F; grey scale: darker represents higher temperature) for an  $AVP^{cre/cre}$  mouse (A-B) and two  $AVP^{cre/cre}::Bmal1^{fl/fl}$  mice (C-F) during at least 10 days in light/dark condition (LD), followed by at least 3 weeks days in constant dark (DD), followed by at least seven days of LD. Note that  $AVP^{cre/cre}::Bmal1^{fl/fl}$  mice retain coherent rhythms of LMA and Tb, but exhibit a lengthened period compared to  $AVP^{cre/cre}$  mice.



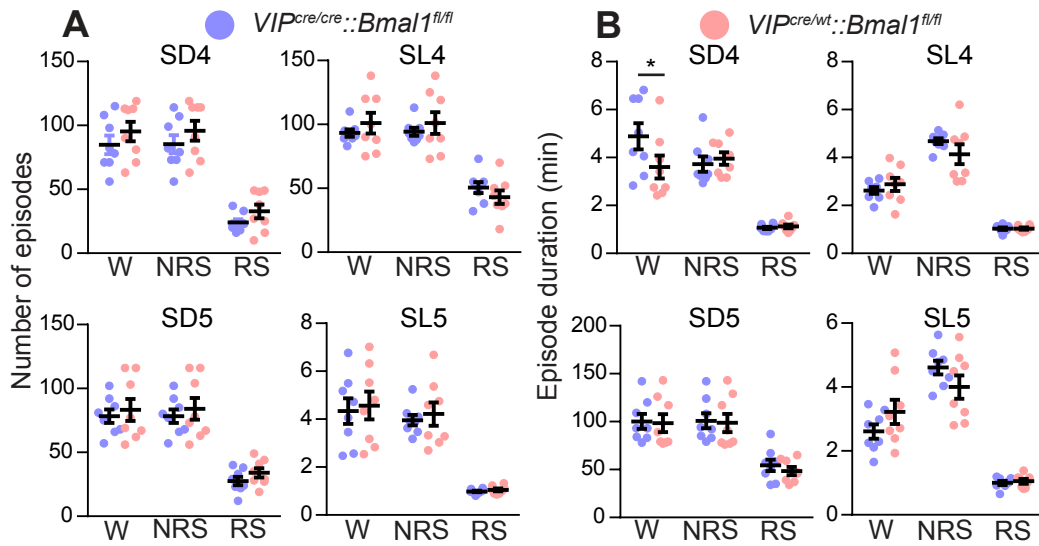

**Figure S5. Sleep-wake qualitative changes following loss of the molecular clock in  $SCN^{VIP}$  neurons. Related to Figure 2. (A)** Number of episodes (mean  $\pm$  s.e.m.) of wake (W), NREM sleep (NRS) or REM sleep (RS) and **(B)** episode duration (mean  $\pm$  s.e.m.) of W, NRS or RS during the 4<sup>th</sup> and 5<sup>th</sup> subjective dark (SD4, SD5), and 4<sup>th</sup> and 5<sup>th</sup> subjective light (SL4, SL5) periods in  $VIP^{cre/cre}::Bmal1^{fl/fl}$  (blue, n = 8) and  $VIP^{cre/wt}::Bmal1^{fl/fl}$  (red, n = 8) mice. \*  $p < 0.05$ , two-way ANOVA followed by a *post hoc* Bonferroni test.

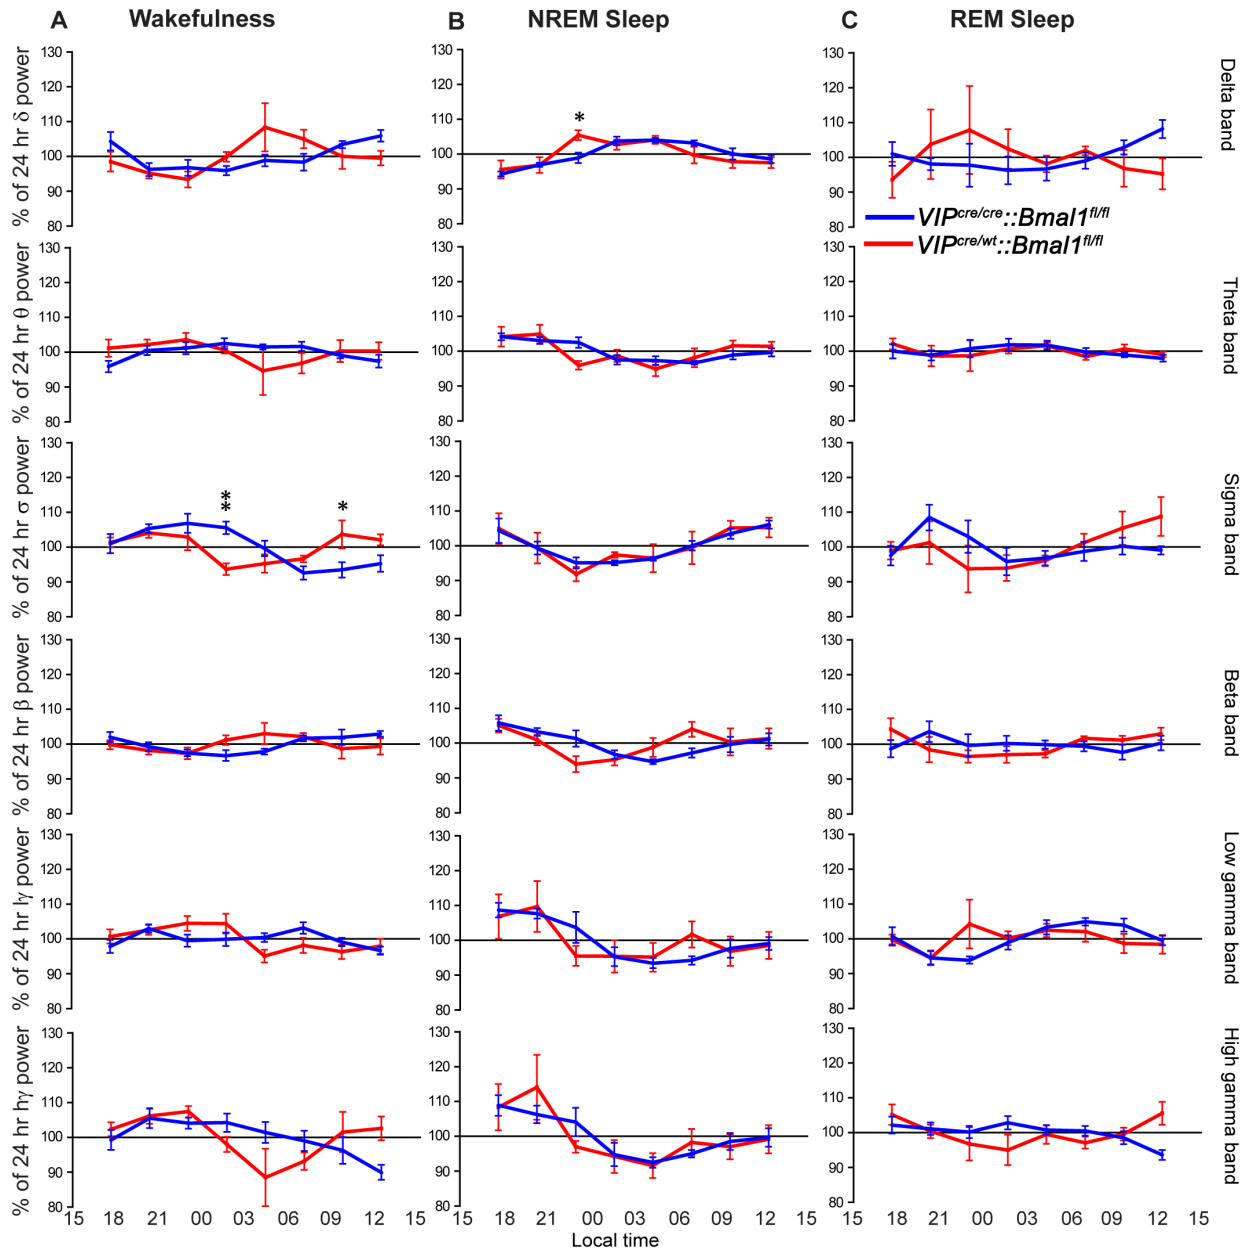

**Figure S6. Sleep-wake cortical EEG power band activity across the 24 hr period following loss of the molecular clock in SCN<sup>VIP</sup> neurons. Related to Figure 2. Delta ( $\delta$ : 0.5–5 Hz), theta ( $\theta$ : 5–9 Hz), sigma ( $\sigma$ : 9–15 Hz), beta ( $\beta$ : 15–30 Hz), low gamma ( $\gamma$ : 30–60 Hz) and high gamma ( $\gamma_H$ : 60–120 Hz) power bands (mean  $\pm$  s.e.m) across 24 hrs of the 4<sup>th</sup> day in constant darkness in *VIP<sup>cre/cre</sup>::Bmal1<sup>fl/fl</sup>* (blue, n = 6) and**

$VIP^{cret/wt}::Bmal1^{fl/fl}$  (red,  $n = 6$ ) mice. Power bands were averaged for each 3 hr period and expressed as a percentage of the 24 hr average power for each frequency band and each vigilance state. \*  $p < 0.05$ , \*\*  $p < 0.01$ , two-way ANOVA followed by a *post hoc* Bonferroni test.

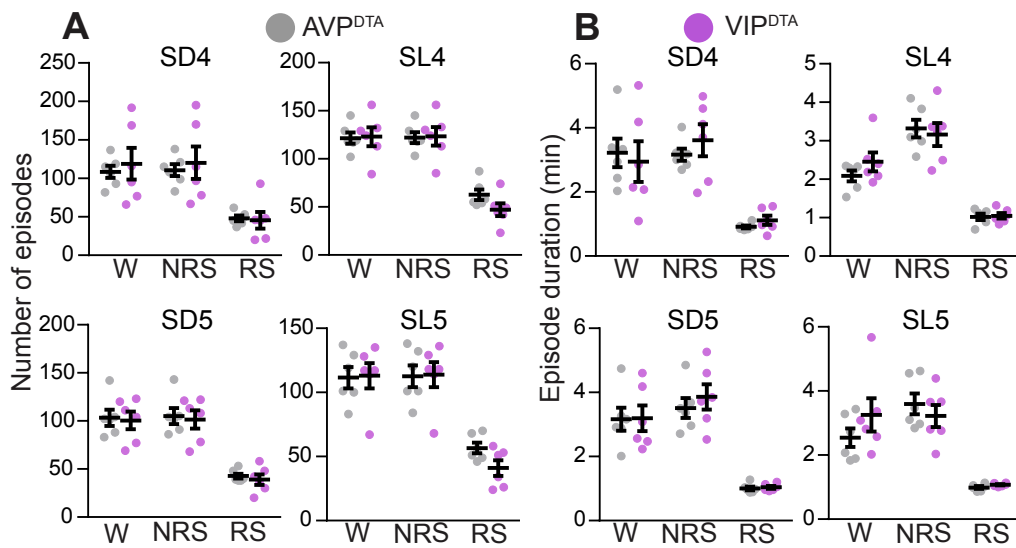

**Figure S7. Sleep-wake qualitative changes following genetically-driven lesions of  $SCN^{VIP}$  or  $SCN^{AVP}$  neurons. Related to Figure 4. (A) Number of episodes (mean  $\pm$  s.e.m.) of wake (W), NREM sleep (NRS) or REM sleep (RS) and (B) episode duration (mean  $\pm$  s.e.m.) of W, NRS or RS during the 4<sup>th</sup> and 5<sup>th</sup> subjective dark (SD4, SD5), and 4<sup>th</sup> and 5<sup>th</sup> subjective light (SL4, SL5) periods in  $AVP^{DTA}$  (grey,  $n = 6$ ) and  $VIP^{DTA}$  (purple,  $n = 6$ ) mice.  $p > 0.05$ , two-way ANOVA followed by a *post hoc* Bonferroni's test.**

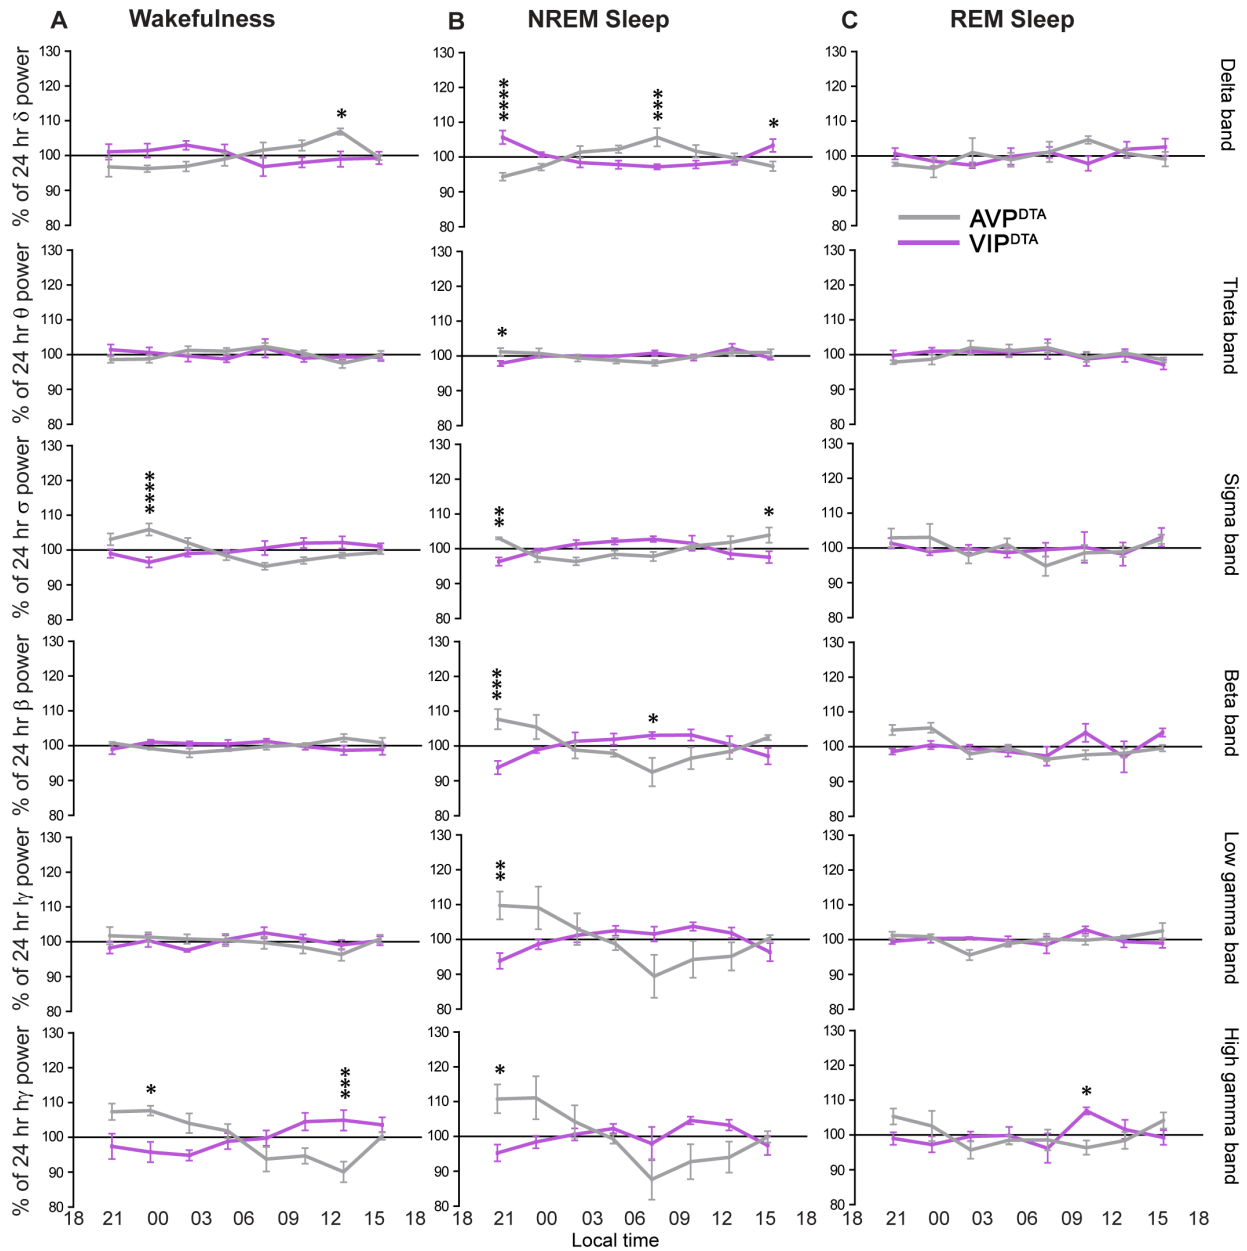

**Figure S8. Sleep-wake cortical EEG power band activity across 24 hr period genetically-driven lesions of SCN<sup>VIP</sup> or SCN<sup>AVP</sup> neurons. Related to Figure 4. Delta ( $\delta$ : 0.5–5 Hz), theta ( $\theta$ : 5–9 Hz), sigma ( $\sigma$ : 9–15 Hz), beta ( $\beta$ : 15–30 Hz), low gamma ( $\gamma$ : 30–60 Hz) and high gamma ( $\gamma_H$ : 60–120 Hz) power band (mean  $\pm$  s.e.m.) activity across 24 hr of the 4<sup>th</sup> day in constant darkness in AVP<sup>DTA</sup> (grey, n=5) and VIP<sup>DTA</sup> (purple, n=6) mice. Power bands were averaged for each 3 hr period and expressed as a percentage**



of the 24 hr average power for each frequency band and each vigilance state. \*  $p < 0.05$ , \*\*  $p < 0.01$ , \*\*\*  $p < 0.001$ , \*\*\*\*  $p < 0.0001$ , two-way ANOVA followed by a *post hoc* Bonferroni test.

**A**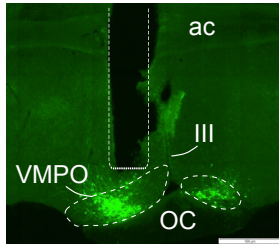**B1**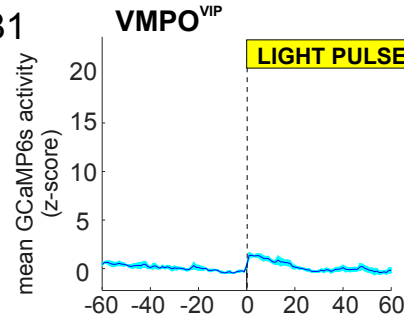**B2**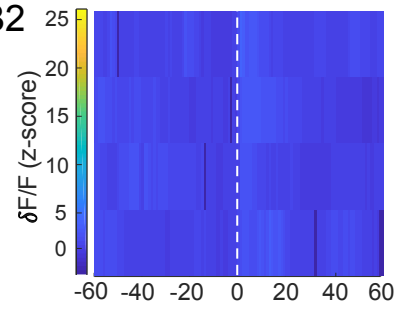

### SUBJECTIVE MORNING (CT 2-5)

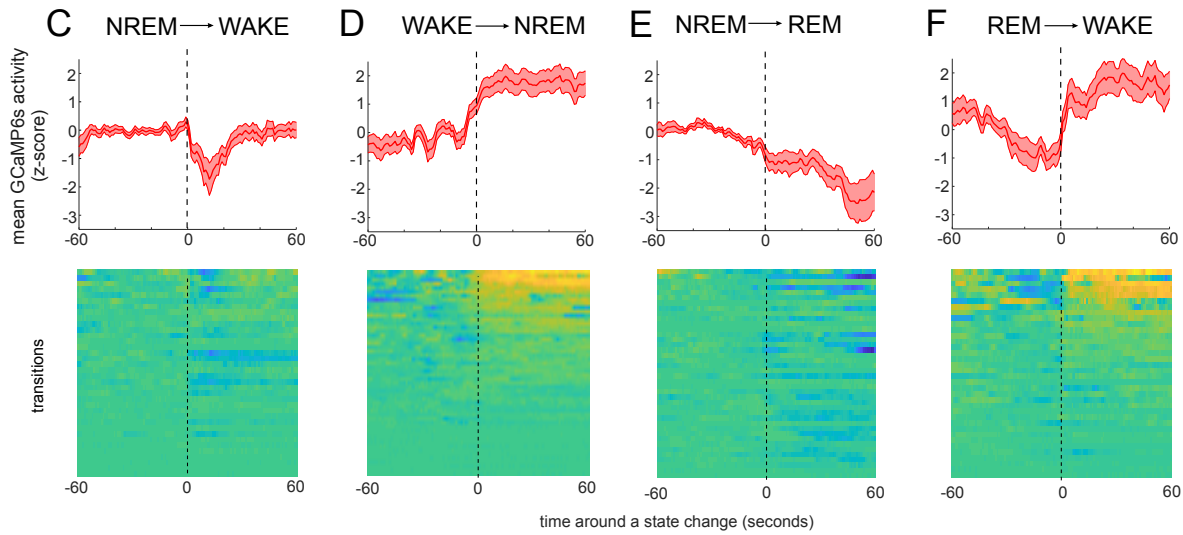

### SUBJECTIVE EVENING (CT 12-14)

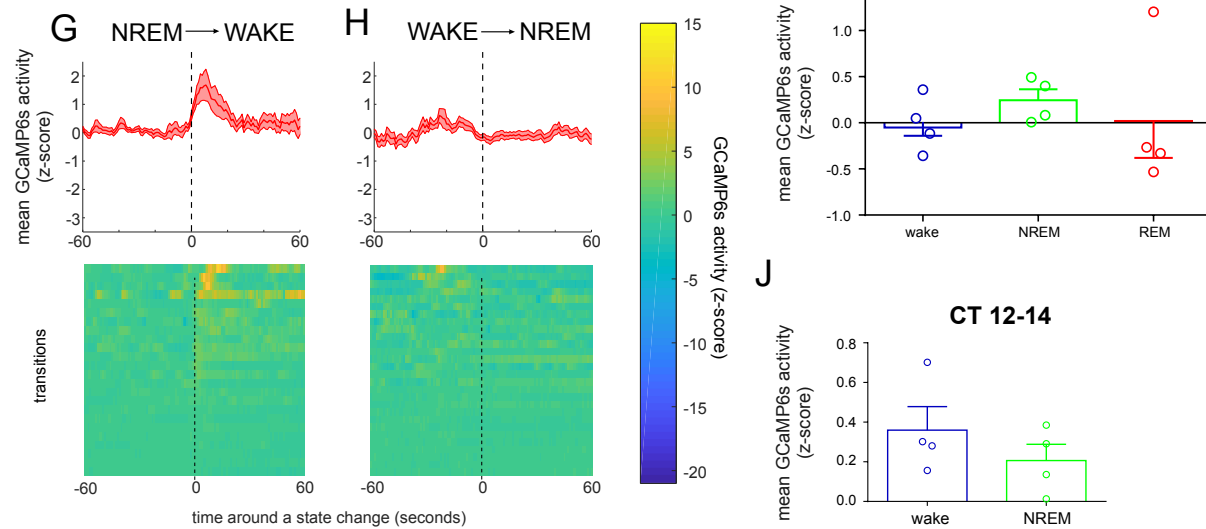

**Figure S9. Activity in SCN<sup>VIP</sup> neurons is behavioral state invariant. Related to Figure**

**7. (A)** Photomicrograph depicting viral targeting to VIP-containing neurons in the ventromedial preoptic nucleus (VMPO<sup>VIP</sup>) and placement of the photometry fiber. Abbreviations: III; 3<sup>rd</sup> ventricle, ac; anterior commissure, OC; optic chiasm **(B1)** Mean GCaMP6s activity in VMPO<sup>VIP</sup> neurons over all mice at the initiation of the light pulse. Black dotted line indicates onset of the light pulse. Shaded area indicates s.e.m. **(B2)** Heatmap depicting GCaMP6s activity at the light pulse for each mouse. White dotted line indicates onset of the light pulse. **(C-J)** GCaMP6s activity at vigilance state transitions during the subjective morning (CT 2-5, C-F) and subjective evening (CT 12-14, G-H). Upper panels: means GCaMP6s activity across mice. Lower panels: Heatmaps depicting individual arousal state transitions from all mice. Paired t-tests (two-tailed) indicate no significant effect of the state transition upon GCaMP6s activity. **(I)** Mean (+ s.e.m) GCaMP6s activity during wake, NREM sleep and REM sleep between CT 2-5. RM one-way ANOVA indicated no significant effect of state upon GCaMP6s activity (Arousal state:  $F(2, 6) = 0.2989, p = 0.7521$ ). **(J)** Mean (+ s.e.m) GCaMP6s activity during wake and NREM sleep between CT 12-14. Paired t-test (two-tailed) indicated no significant effect of state upon GCaMP6s activity ( $p = 0.3128, n = 4$ ).

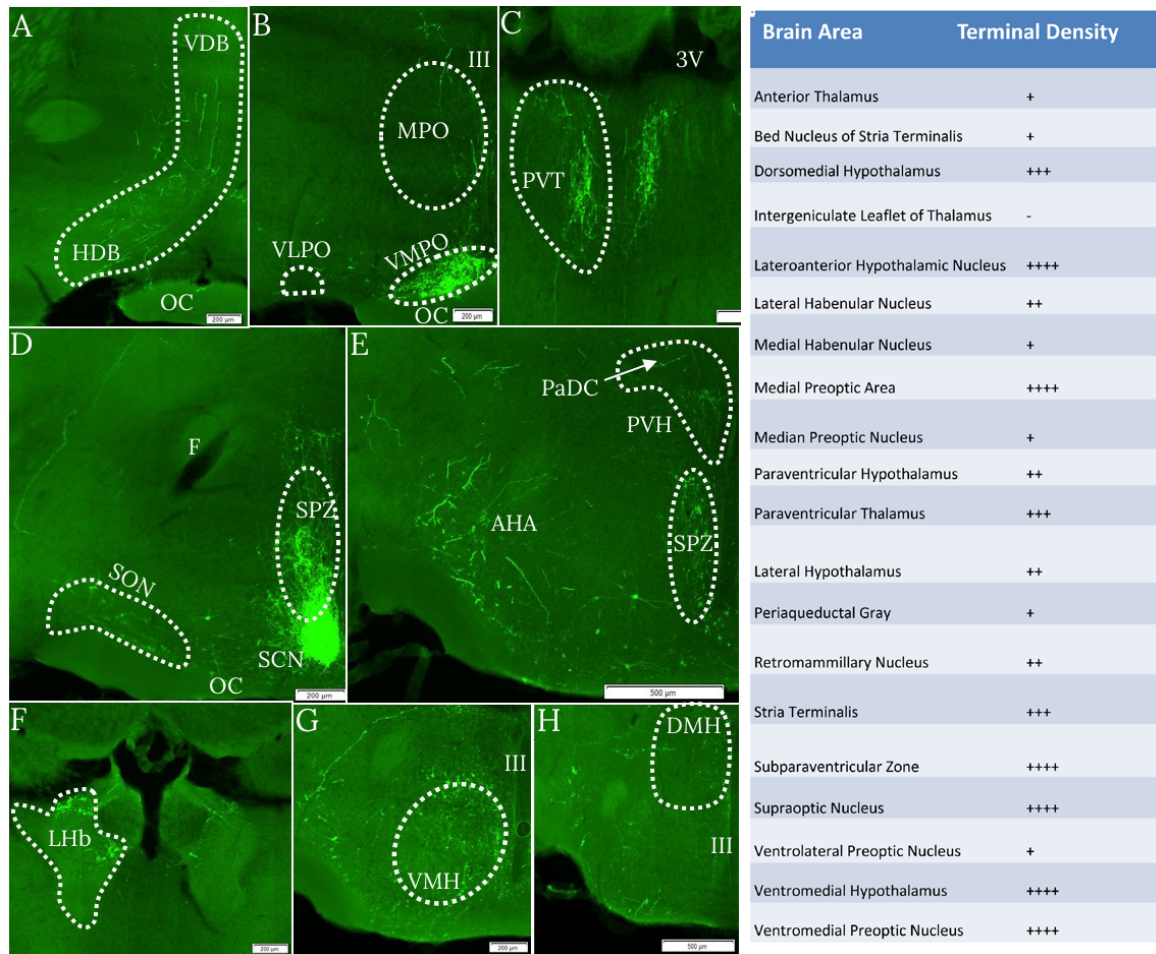

**Figure S10. SCN<sup>VIP</sup> neurons project densely to the subparaventricular zone and provide innervation to many other hypothalamic and non-hypothalamic structures.**

**Related to Figure 8.** The anterograde tracer, AAV-FLEX-hrGFP was injected unilaterally into the SCN of *VIP-IRES-Cre* mice and axons filled with the tracer were assessed using a semi-quantitative method (see Methods) throughout the neuraxis. **(A-H)** Photomicrographs of hrGFP immunoreactivity (green) in the ventral diagonal band (VDB) and horizontal diagonal band (HDB) **(A)**, the ventromedial preoptic nucleus (VMPO) **(B)**, the paraventricular nucleus of the thalamus (PVT) **(C)**, the subparaventricular zone (SPZ) **(D)**, the paraventricular hypothalamus (PVH) and supraoptic nucleus (SON) **(E)**, the lateral habenula (LHb) **(F)**, the ventromedial hypothalamic nucleus (VMH) **(G)** and the



dorsomedial hypothalamic nucleus (DMH) (**H**). (**I**) Table showing density of axons in each brain region. Abbreviations: III, 3<sup>rd</sup> ventricle; AHA, anterior hypothalamic area, anterior part; DMH, dorsomedial hypothalamic nucleus; HDB, nucleus of the horizontal limb of the diagonal band; LHb, lateral habenular nucleus; MPO, medial preoptic nucleus; OC, optic chiasm; PaDC, paraventricular hypothalamic nucleus, dorsal cap; PVH, paraventricular hypothalamic nucleus; PVT, paraventricular thalamic nucleus; SON, supraoptic nucleus; SPZ, subparaventricular zone of the hypothalamus; VDB, nucleus of the vertical limb of the diagonal band; VLPO, ventrolateral preoptic nucleus; VMH, ventromedial hypothalamic nucleus; VMPO, ventromedial preoptic nucleus.

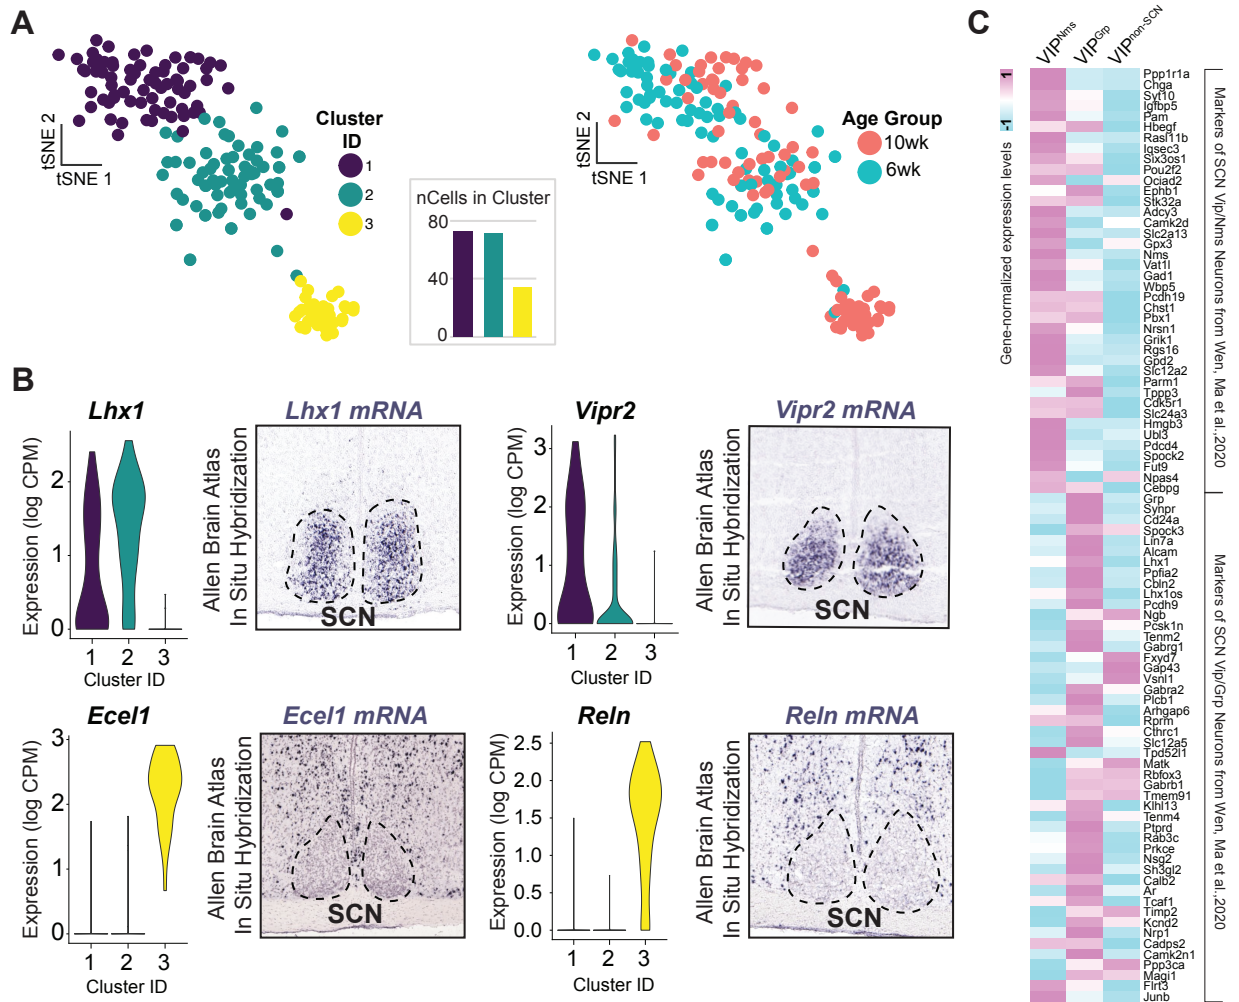

**Figure S11. sNuc-seq analysis reveals three distinct VIP neuron populations, including two from the SCN.** (A) t-Distributed Stochastic Neighbor Embedding (tSNE) plots of clustered VIP neurons, colored by cluster identity (left) or mouse age group (right). (B) Single-cell expression of genes enriched in or around the SCN, with corresponding in situ hybridization images from the Allen Mouse Brain Atlas: *Lhx1*, experiment 633; *Vipr2*, experiment 1104; *Ecel1*, experiment 70231305; and *Reln*, experiment 890. (C) Heatmap of cluster-level average expression (columns) of top marker genes (rows) for Vip/Grp neurons and Vip/Nms neurons identified by Wen, Ma et al., 2020<sup>46</sup>.

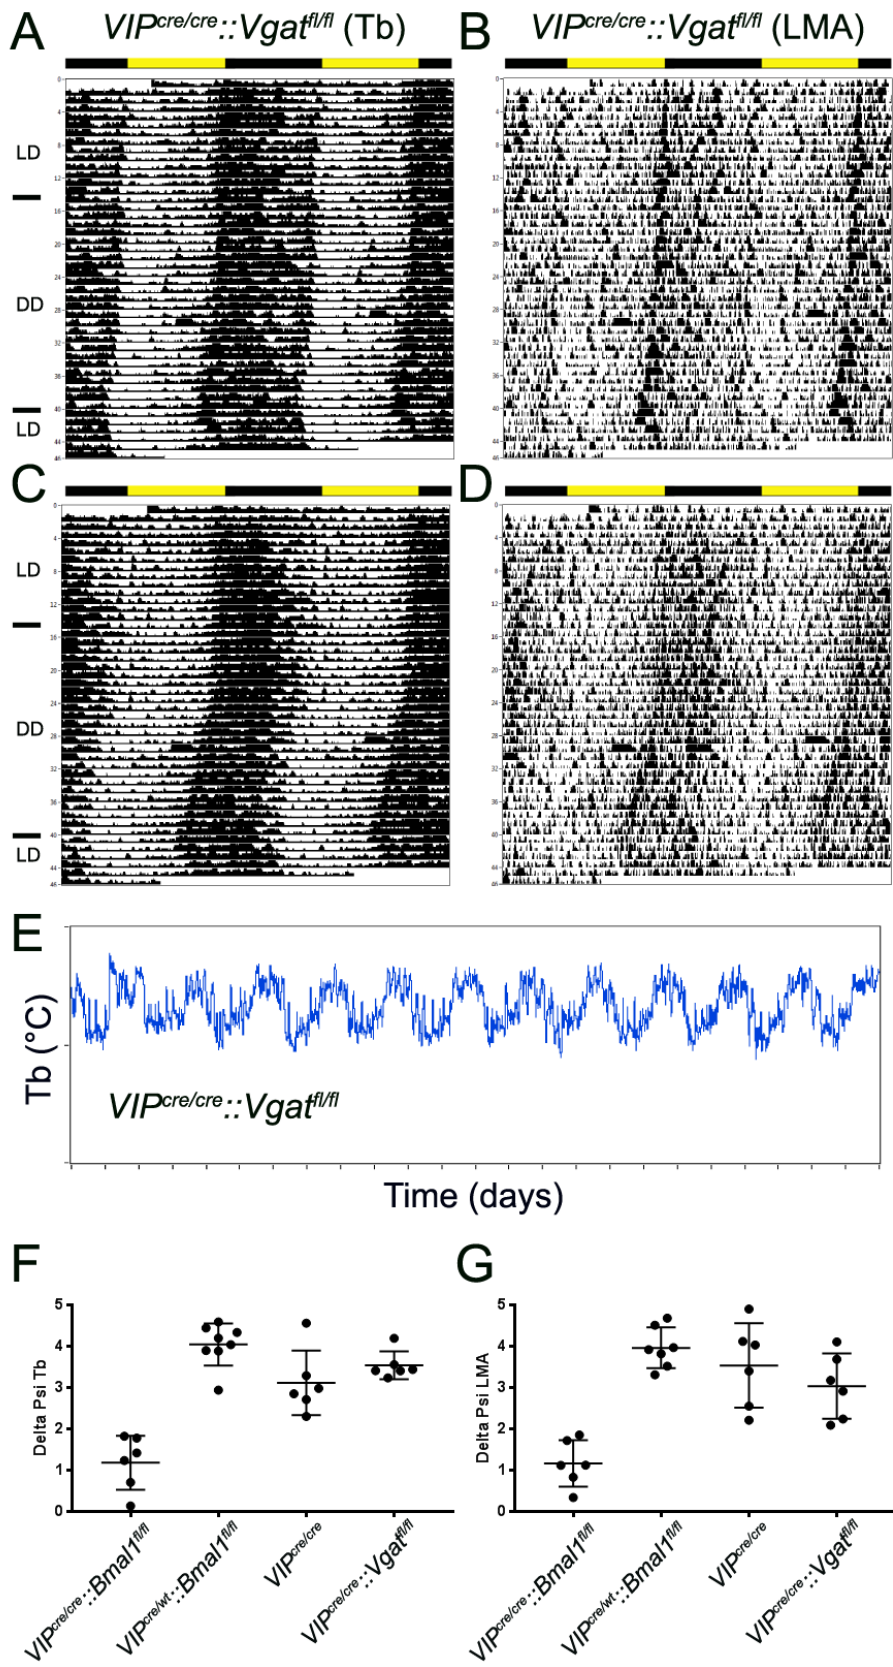

**Fig S12. Genetic disruption of GABAergic transmission from SCN<sup>VIP</sup> neurons. (A-D)** Selective deletion of *Vgat* in SCN<sup>VIP</sup> neurons produced no discernable disruption in the diurnal (LD) or circadian (DD) rhythms of Tb or LMA (n=2 *VIP<sup>cre/cre</sup>::Vgat<sup>fl/fl</sup>* mice shown). **(E)** High amplitude circadian rhythms of Tb were observed in the *VIP<sup>cre/cre</sup>::Vgat<sup>fl/fl</sup>* (cf. with *VIP<sup>cre/cre</sup>::Bmal1<sup>fl/fl</sup>* mouse in Fig S3A). **(F-G)** deletion of *Vgat* in SCN<sup>VIP</sup> neurons reduced the variability of the phase angle of entrainment of Tb, but not LMA, as compared to *VIP<sup>cre/cre</sup>* mice (i.e., putative hypomorphic condition). *VIP<sup>cre/cre</sup>::Bmal1<sup>fl/fl</sup>*, n=6; *VIP<sup>cre/wt</sup>::Bmal1<sup>fl/fl</sup>*, n=7; *VIP<sup>cre/cre</sup>*, n=6; *VIP<sup>cre/cre</sup>::Vgat<sup>fl/fl</sup>*, n=6. Means  $\pm$  s.e.m.



## Anatomical Abbreviations and Quantification for Figure 9

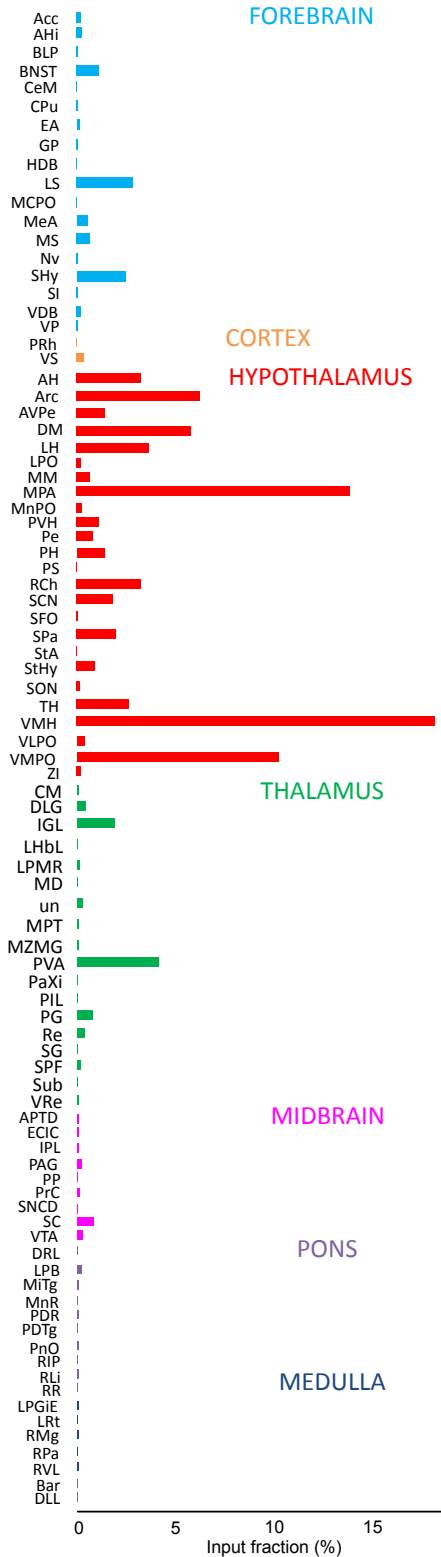

Abbreviation List: 3V, 3rd ventricle; ac, anterior commissure; Acc, accumbens nucleus; AH, anterior hypothalamic area, anterior part; Ahi, amygdalohippocampal area; alv, alveus of the hippocampus; APTD, anterior pretectal nucleus, dorsal part; Arc, arcuate hypothalamic nucleus; AVPe, anteroventral periventricular nucleus; Bar, Barrington's nucleus; BLP, basolateral amygdaloid nucleus, posterior part; BNST, bed nucleus of the stria terminalis; CeM, central amygdaloid nucleus, medial division; CM, central medial thalamic nucleus; CPu, caudate putamen (striatum); DLG, dorsal lateral geniculate nucleus; DLL, dorsal nucleus of the lateral lemniscus; DM, dorsomedial hypothalamic nucleus; DRL, dorsal raphe nucleus, lateral part; EA, extended amygdala; ECIC, external cortex of the inferior colliculus; fx, fornix; GP, globus pallidus; HDB, nucleus of the horizontal limb of the diagonal band; IGL, intergeniculate leaflet; IPL, interpeduncular nucleus, lateral subnucleus; LH, lateral hypothalamic area; LHbL, lateral habenular nucleus, lateral part; LPB, lateral parabrachial nucleus; LPGiE, lateral paragigantocellular nucleus, external part; LPMR, lateral posterior thalamic nucleus, mediorostral part; LPO, lateral preoptic area; LRt, lateral reticular nucleus; LSD, lateral septal nucleus, dorsal part; LSV, lateral septal nucleus, ventral part; LV, lateral ventricle; MCPO, magnocellular preoptic nucleus; MD, mediodorsal thalamic nucleus; MeA, medial amygdaloid nucleus, anterior part; MiTg, microcellular tegmental nucleus; MM, medial mammillary nucleus, medial part; MnPO, median preoptic nucleus; MnR, median raphe nucleus; MPA, medial preoptic area; MPT, medial pretectal nucleus; MS, medial septal nucleus; MZMG, marginal zone of the medial geniculate; Nv, navicular postolfactory nucleus; opt, optic tract; ox, optic chiasm; PAG, periaqueductal gray; PaXi, paraxiphoid nucleus of thalamus; PDR, posterodorsal raphe nucleus; PDTg,

posterodorsal tegmental nucleus; Pe, periventricular hypothalamic nucleus; PG, pregeniculate nucleus; PGMC, pregeniculate nucleus, magnocellular part; PGPC, pregeniculate nucleus, parvicellular part; PH, posterior hypothalamic nucleus; PIL, posterior intralaminar thalamic nucleus; PnO, pontine reticular nucleus, oral part; PP, peripeduncular nucleus; PrC, precommissural nucleus; PRh, perirhinal cortex; PS, parastrial nucleus; PVA, paraventricular thalamic nucleus, anterior part; PVH, paraventricular hypothalamic nucleus; PaDC, paraventricular hypothalamic nucleus, dorsal cap; Re, reuniens thalamic nucleus; RIP, raphe interpositus nucleus; RLi, rostral linear nucleus (midbrain); RMg, raphe magnus nucleus; RR, retrorubral nucleus; RVL, rostroventrolateral reticular nucleus; SC, superior colliculus; SCN, suprachiasmatic nucleus; SFO, subfornical organ; SG, suprageniculate thalamic nucleus; SHy, septohypothalamic nucleus; SHY, septohypothalamic nucleus; SI, substantia innominate; SNCD, substantia nigra, compact part, dorsal tier; SON, supraoptic nucleus; Spa, subparaventricular zone of the hypothalamus; SPF, subparafascicular thalamic nucleus; StA, strial part of the preoptic area; STLI, bed nucleus of the stria terminalis, lateral division; STLP, bed nucleus of the stria terminalis, lateral division, posterior part; STLV, bed nucleus of the stria terminalis, lateral division, ventral part; STMA, bed nucleus of the stria terminalis, medial division, anterior part; STMAL, bed nucleus of the stria terminalis, medial division, anterolateral part; Sub, submedial thalamic nucleus; Te, terete hypothalamic nucleus; un, unassigned thalamic area, located between the fasciculus retroflexus; VDB, nucleus of the vertical limb of the diagonal band; VLPO, ventrolateral preoptic nucleus; VMH, ventromedial hypothalamic nucleus; VMPO, ventromedial preoptic nucleus; VP, ventral pallidum; VRe, ventral reuniens thalamic nucleus; VS, ventral subiculum; VTA, ventral tegmental area, ZI, zona incerta.
